# Supplementary material
Source: PubMed Central journal article supplement (PMC2661149)
Supplement: NIHMS85889-supplement-legends.pdf [file NIHMS85889-supplement-legends.pdf]

## Legends for Supplemental figures Wang et. al.

**Fig. S1.** PARP cleavage and zVAD-fmk inhibition of PARP cleavage. (A) PARP cleavage after TNF $\alpha$  treatment. HeLa cells were treated with 50 ng/ml TNF $\alpha$  for 6 hours, harvested and western blotted with a PARP antibody. (B) PARP cleavage induced by STS was inhibited by broad based caspase inhibitor zVAD-fmk. Cells were treated for the indicated times in the presence of 50  $\mu$ M zVAD-fmk, where indicated, harvested and western blotted with a PARP antibody.

**Fig. S2.** Treatment of cells with latrunculin A disrupts cell cytoskeleton. HeLa cells were treated with 5  $\mu$ M latrunculin A (LA) for 1 hour, and the cells were observed under a phase microscope. Similarly to the STS-treated cells, LA-treated cells rounded up, indicating disruption of the cytoskeleton.

**Fig. S3.** Reduction of CAP1 level in CAP1-knockdown cells as detected by immunofluorescence. HeLa WT cells and CAP1 knockdown cells (S3-2) were labeled with mitotracker, cells were fixed and stained with anti-CAP1 antibody as in Fig. 2 and detected using an Alexa Fluor 350 goat anti-mouse IgG (H+L). The cells were observed for mitochondria staining and CAP1 level. CAP1 staining in S3-2 cells is significantly reduced.

**Fig. S4.** Translocation of Bak to mitochondria after STS treatment. NIH 3T3 cells were treated with STS for 3 hours to stimulate apoptosis. Cells were incubated with mitotracker, fixed, stained with Rabbit anti-Bak (Sigma) and Goat anti-rabbit Alexa Fluor 488. Cells were observed under confocal microscopy.

**Fig. S5.** Knockdown of cofilin did not prevent CAP1 translocation to mitochondria upon STS stimulation. HeLa cells grown on 100 mm plates were transfected with cofilin shRNA or a scrambled control using lipofectamine. 72 hours after transfection, the cells were treated with 1  $\mu$ M STS for 2 hours. The mitochondrial and cytosol fractions were collected and western blotted to determine CAP1 translocation to mitochondria. The cofilin knockdown efficiency was typically 50-75% in our experiments.

**Fig. S6.** Treatment with STS does not affect CAP1 association with actin. 293T cells were transfected with a plasmid expressing a 6xHis tagged CAP1. After 24 hours, the cells were treated with 1  $\mu$ M STS for 2 hours as indicated, harvested and the fusion protein was purified using nickel beads. After elution with a buffer containing imidazole, the samples were resolved on a SDS gel and stained using the Colloidal Blue Stain Kit (Invitrogen). The (His)CAP1 and actin bands are indicated with arrow and arrowheads, respectively.

**Fig. S7.** Reduction of cytochrome *c* release to cytosol in CAP1-knockdown cells detected by immunofluorescence. HeLa WT or CAP1 KD (S3-2) cells were incubated with mitotracker for 1 hour followed by treatment with 100  $\mu$ M etoposide for 24 hours. Cells were fixed, and stained with cytochrome *c* antibody and goat anti-rabbit Alexa Fluor 488. Cells were observed under fluorescence microscopy.
